# Supplementary material for: Studying Parameters Affecting Accumulation of Chilling Units Required for Olive Winter Flower Induction
Source: MDPI journal article supplement (doi:10.3390/plants12081714), 2023-04-20
Supplement: s1 [file s1]

**Supplementary Figure S1.** Number of buds per branch ( $n$ ) and percent buds forming inflorescences ( $i$ ) under different levels of fruit load. Experiment was performed on four potted fruit-bearing ‘Barnea’ trees. Potted trees were transferred to a controlled environment of 16/10 °C (day/night) on July 27<sup>th</sup>, 2020 until October 11<sup>th</sup>, 2020. Branches with or without (w/o) fruit (ten each) were marked at the beginning of the experiment. Average  $n$  values (A) and  $i$  values (B) evaluated on November 2020 are presented. The error bars represent the standard error of the mean for each treatment.

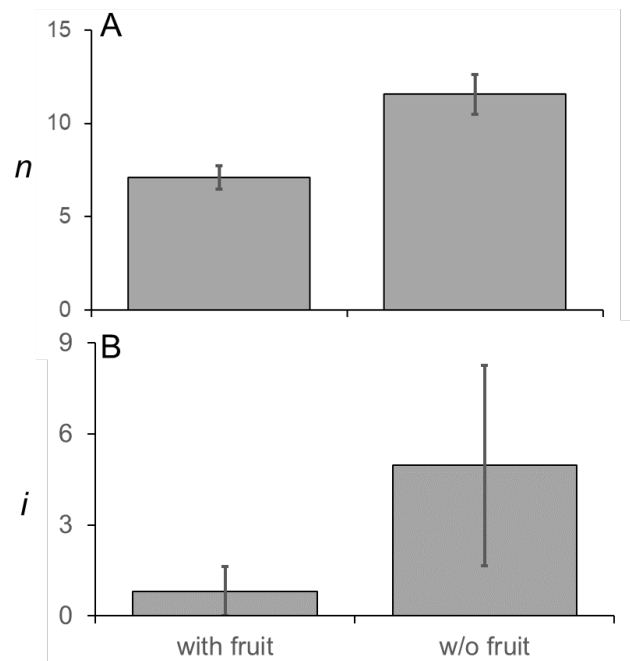

**Supplementary Figure S2:** Changes in branch water potential (MPa) under forced drought (FD) treatment. Water potential values are in megapascals (MPa) calculated from one branch per plant, 5 biological repeats (plants) per cultivar per treatment (well-watered and FD) throughout the experimental drought period. There were six sampling dates, one week apart, starting two weeks after the FD treatment began. Values for each tree in the experiment are presented. An asterisk marks drought plants irrigated for a single day (one asterisk) or a few days (two asterisks connected by a dotted line). All drought treated plants received irrigation between the 24<sup>th</sup> and 27<sup>th</sup> of December (Green asterisk) A-B. ‘Picholine’, C-D. ‘Barnea’, E-F. ‘Souri’, G-H. ‘Coratina’, I-J. ‘Koroneiki’. Numbers in Coratina Forced drought treatment are  $i$  values for each of the trees.

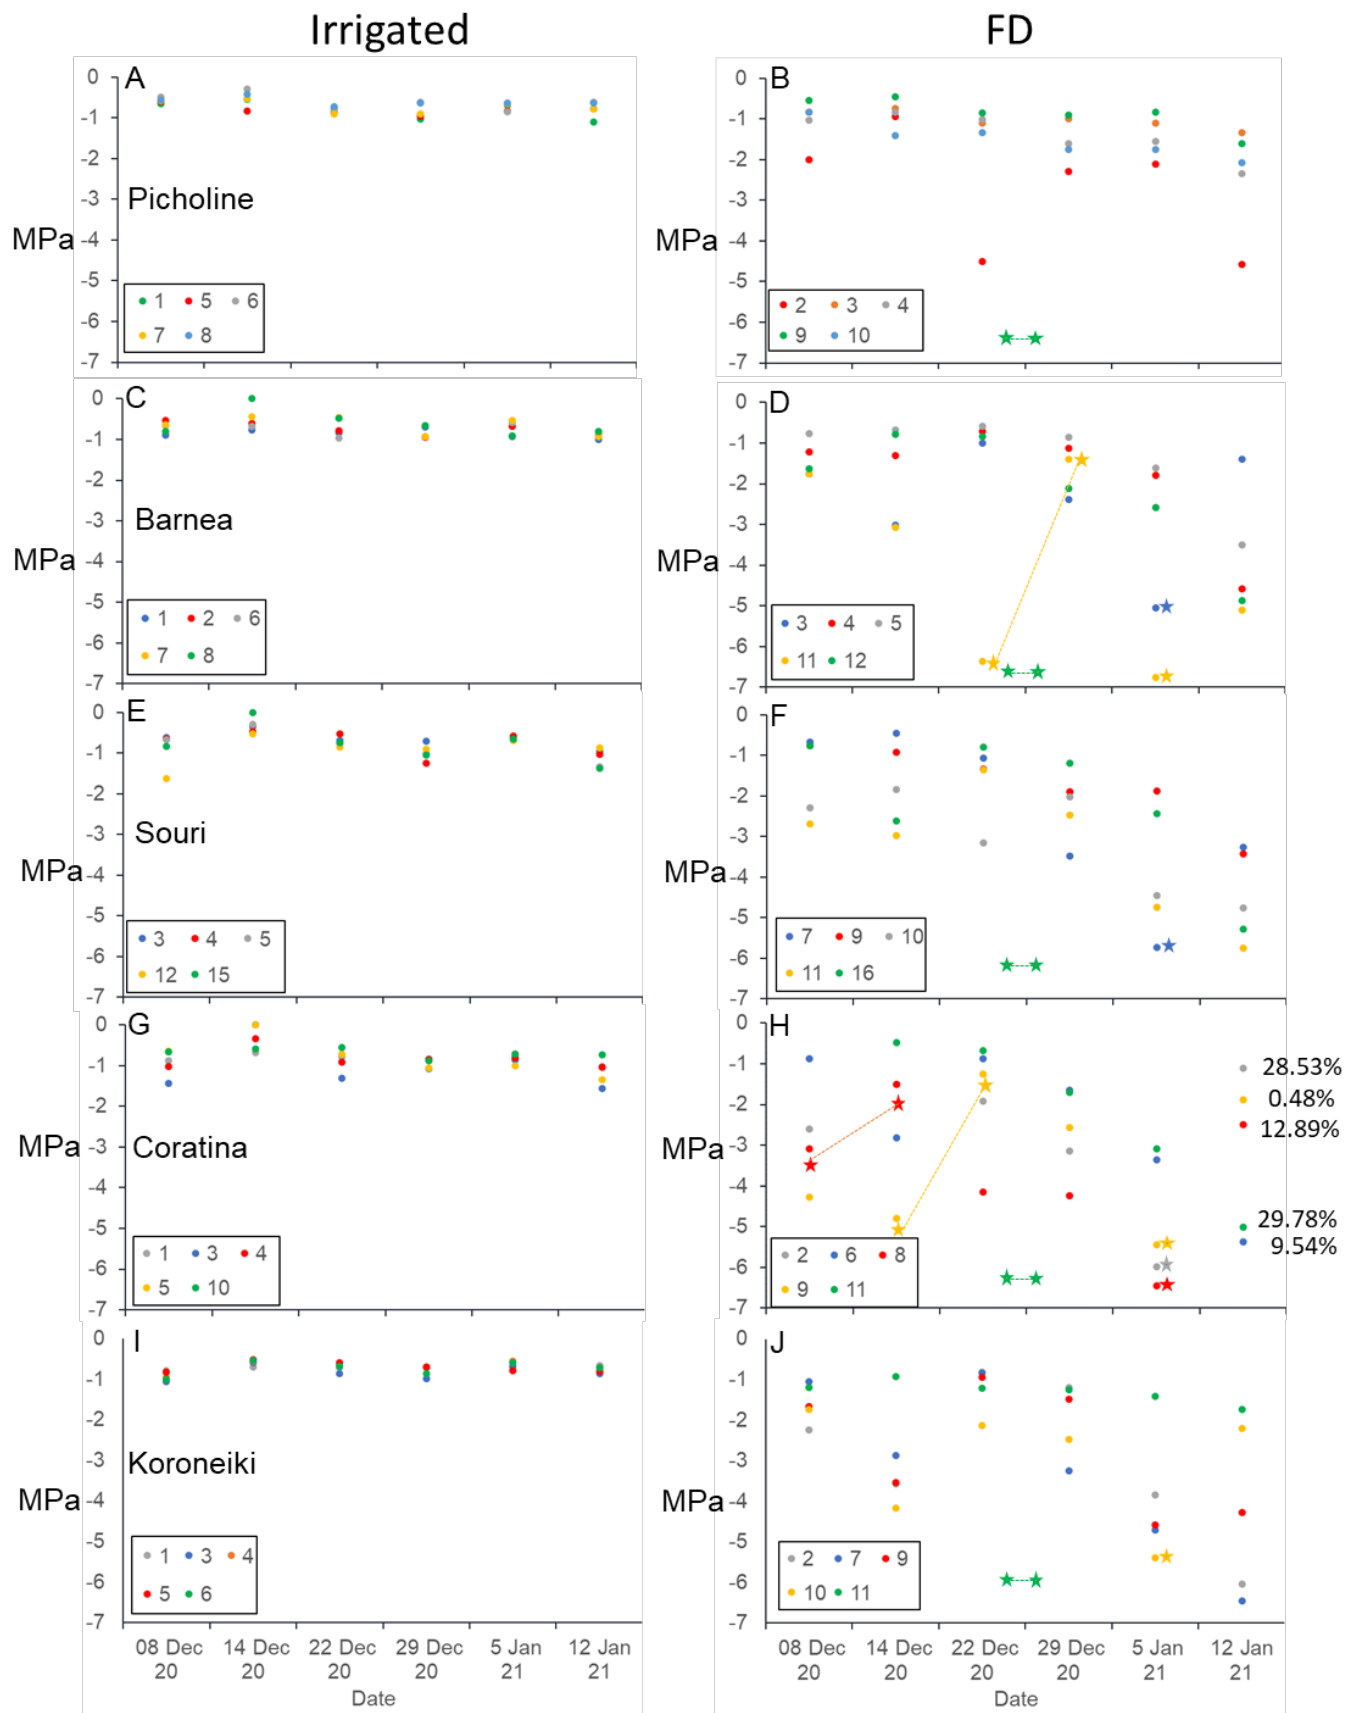

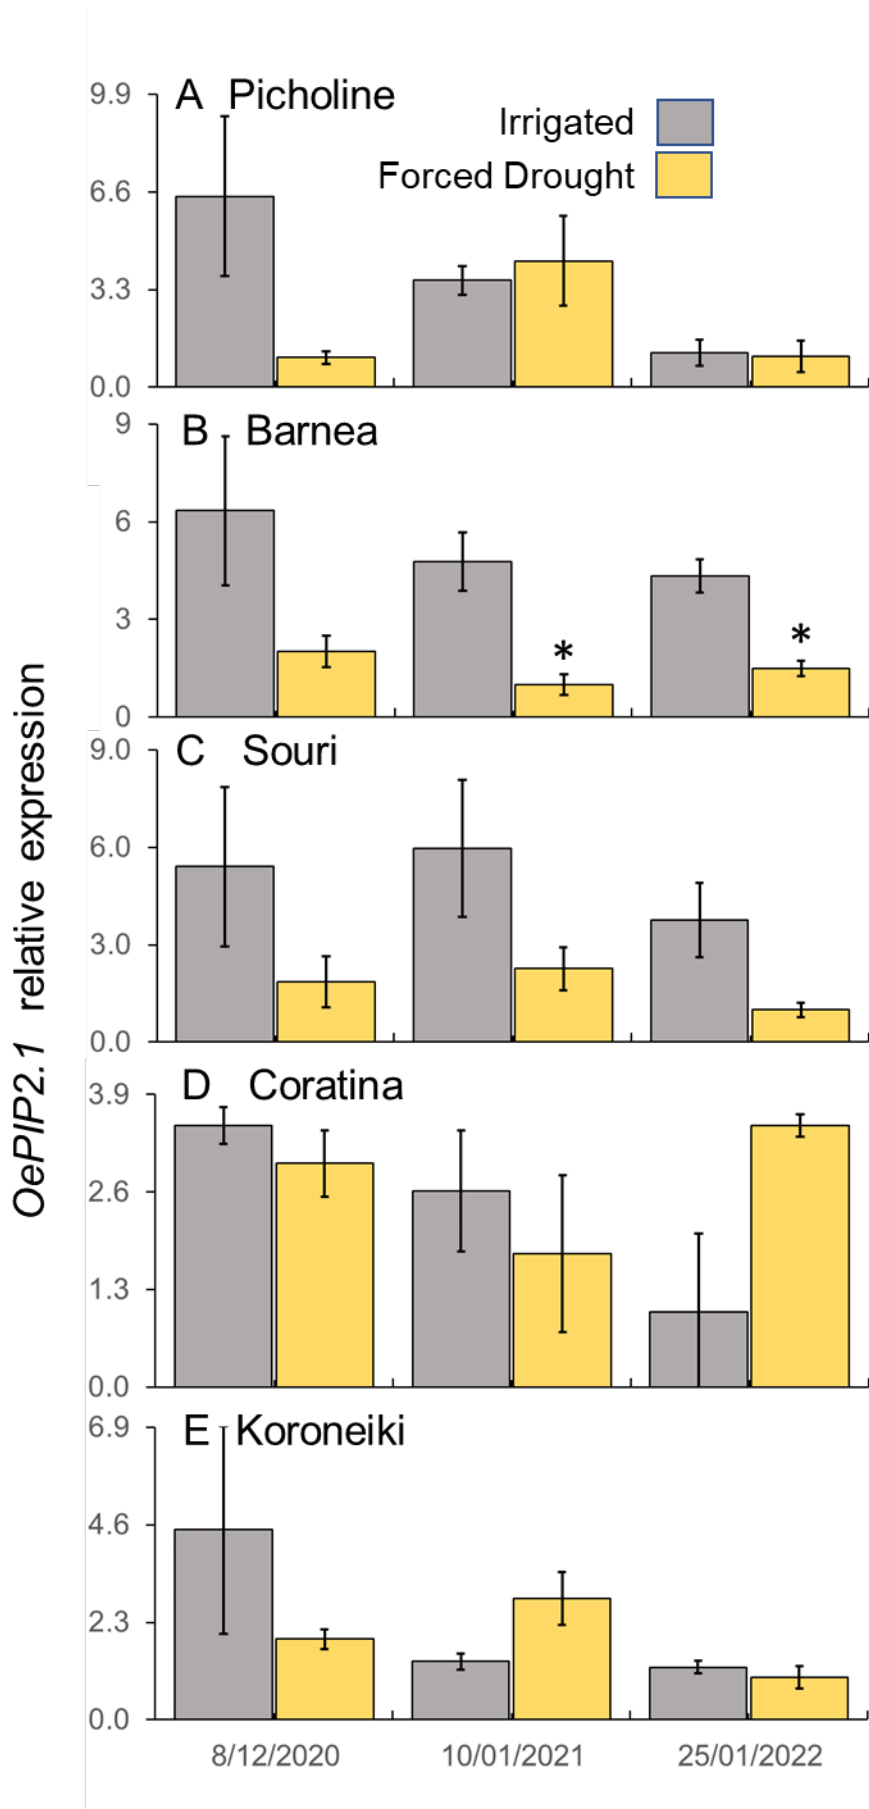

### Supplementary Figure 3:

Changes in *OePIP2.1* gene expression in different cultivars under forced winter drought. Trees and treatments are described in Figure 2. *OePIP2.1* relative expression in leaves in three-time points during winter, in well-irrigated or Forced Drought trees. Means are made of samples taken from 5 biological repeats (trees). The standard error of the mean is presented as bars. Asterisks denote significant differences  $P \leq 0.05$  between treatments at the same time point.

**Supplementary Figure S4:** Changes in *OeFT2* gene expression and percent buds forming inflorescences (*i*) in different cultivars. This figure combines results of well irrigated and FD tress for each cultivar, presented separately in Figure 3. Trees and treatments described in Figure 2. *OeFT2* relative expression in leaves (A), in three time points during winter Means are made of samples taken from 10 biological repeats (trees). Standard error of the mean is presented as bars. *i* values (B) were calculated for 18-20 branches per tree, and the means for each tree calculated. Box and whiskers plot as in Figure 2.

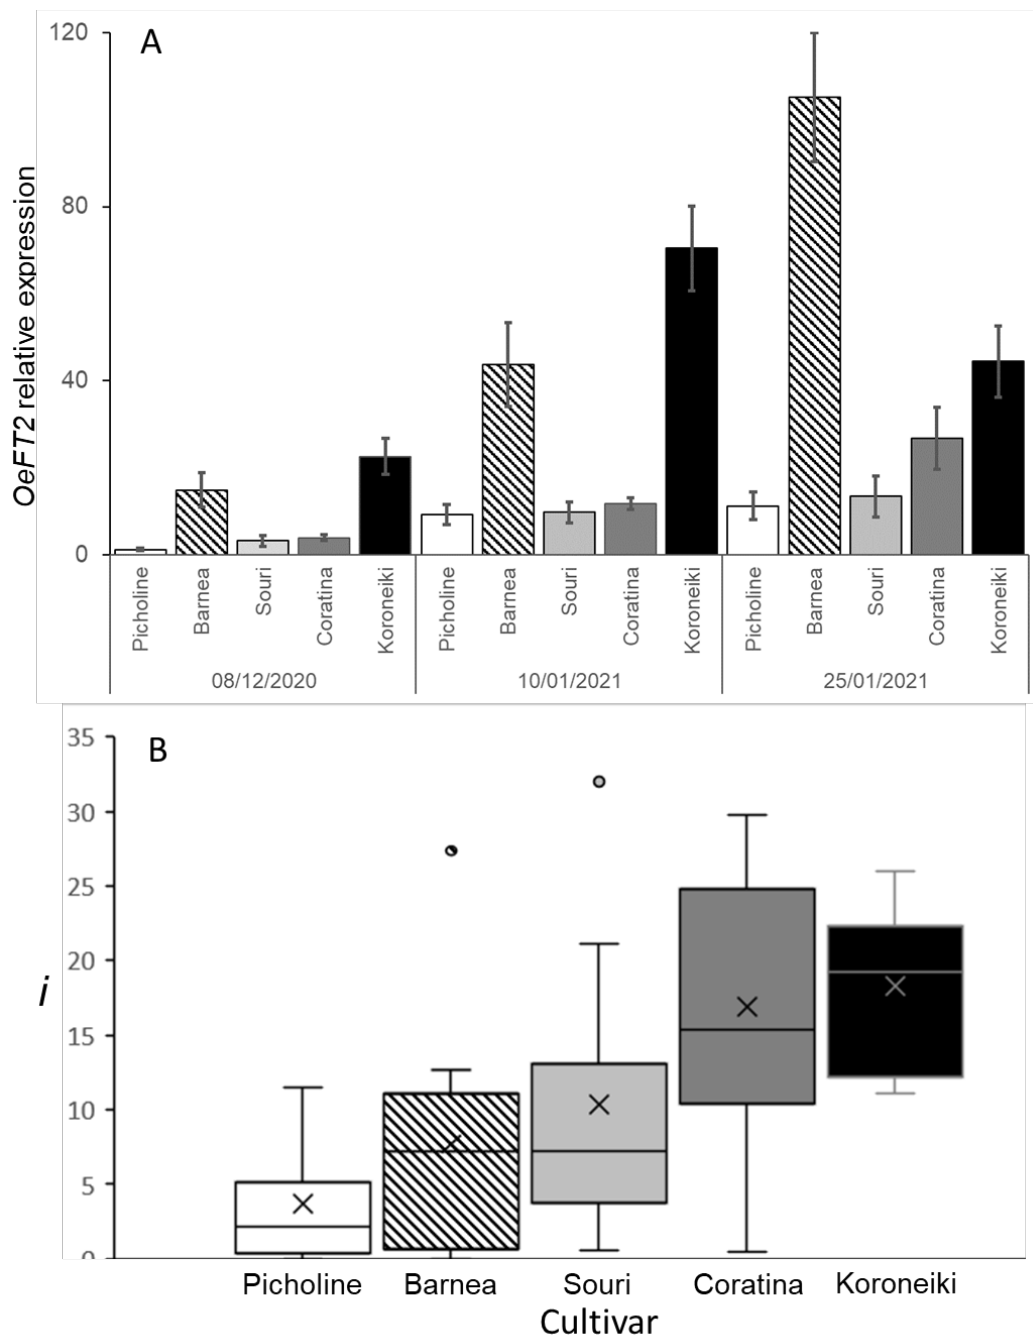

**Supplementary Figure S5.** Scheme of major experiments presented in the manuscript.

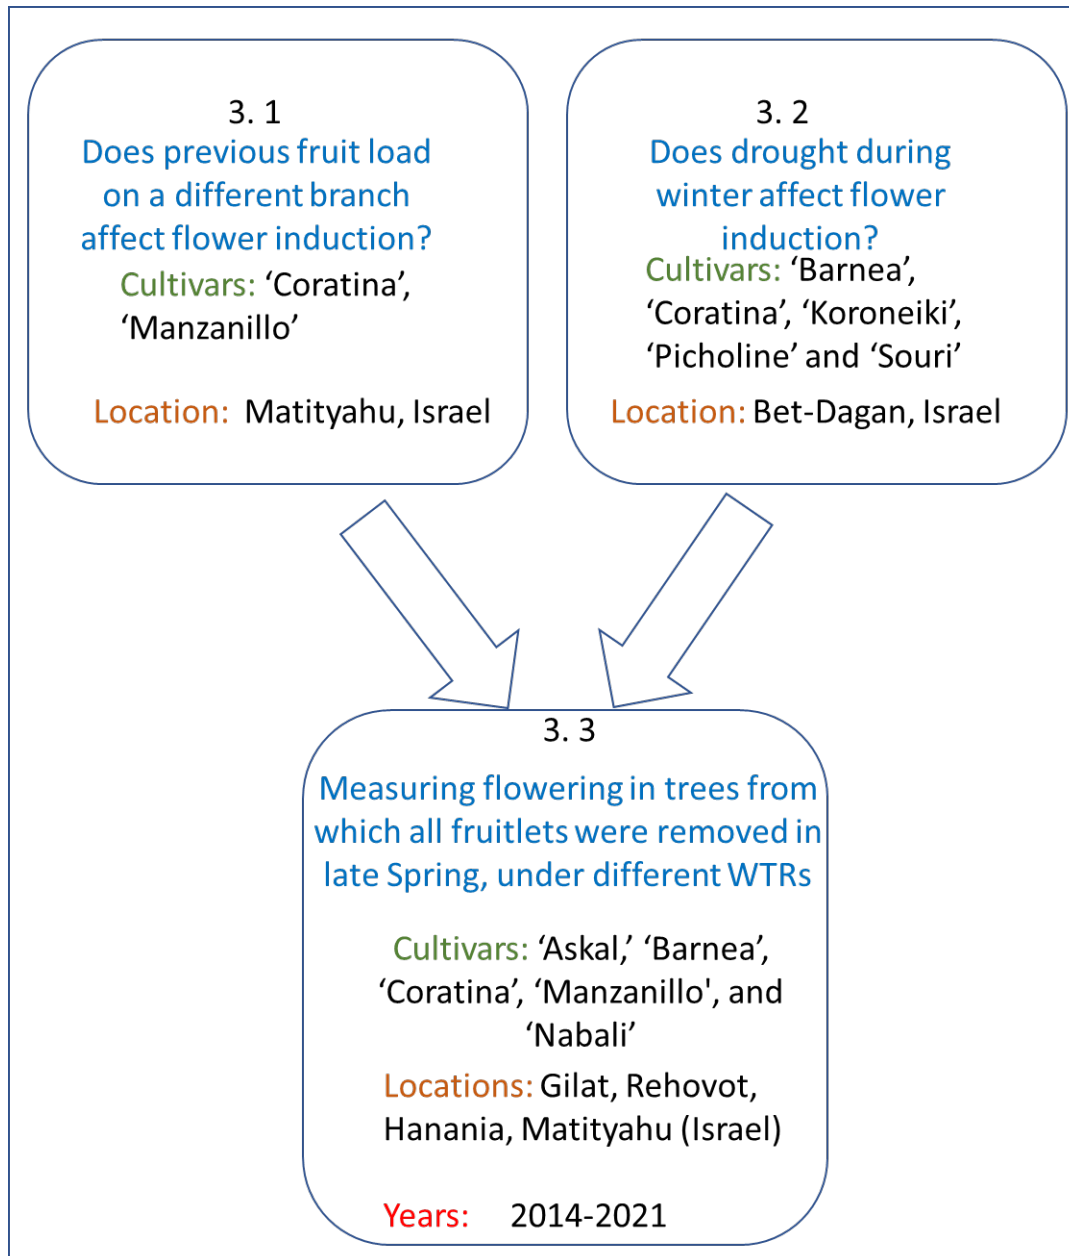

**Supplementary Figure S6.** Forced Drought (FD) treatment set up. Plant trunks and pots were covered with waterproof cloth and raised on cinderblocks to prevent all water access.

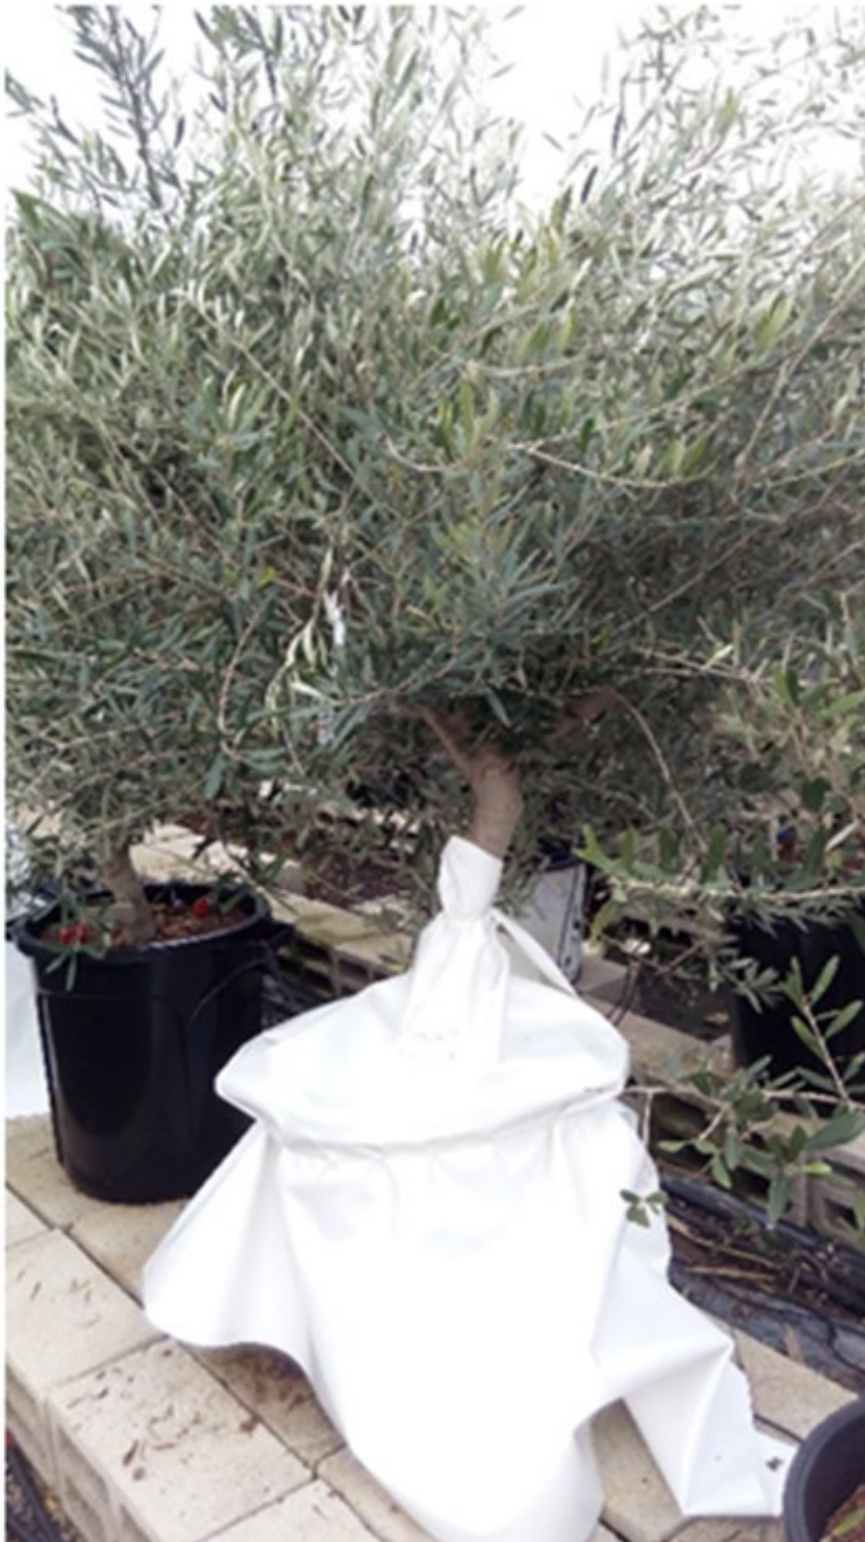

**Supplementary Table S1.** Effect test of fruit load on the number of buds per branch (*n*)

|                           | DF | Sum of Squares | F Ratio | Prob > F |     |
|---------------------------|----|----------------|---------|----------|-----|
| <b>Treatment</b>          | 3  | 88             | 15.11   | 6.28E-05 | *** |
| <b>Cultivar</b>           | 1  | 6              | 3.30    | 0.0882   |     |
| <b>Treatment*Cultivar</b> | 3  | 31             | 5.40    | 0.0092   | **  |

**Supplementary Table S2.** Effect test of fruit load on percent buds forming inflorescences (*i*)

|                           | DF | Sum of Squares | F Ratio | Prob > F |     |
|---------------------------|----|----------------|---------|----------|-----|
| <b>Treatment</b>          | 3  | 12264          | 56.20   | 1.02E-08 | *** |
| <b>Cultivar</b>           | 1  | 23             | 0.32    | 0.5784   |     |
| <b>Treatment*Cultivar</b> | 3  | 3108           | 14.24   | 8.81E-05 | *** |



**Supplementary Table S3.** Effect test of forced drought (FD) on branch water potential (MPA).

|                                | DF | Sum of Squares | F Ratio | Prob > F |     |
|--------------------------------|----|----------------|---------|----------|-----|
| <b>Cultivar</b>                | 4  | 20             | 5.48    | 0.0003   | *** |
| <b>Treatment</b>               | 1  | 192            | 214.38  | 6.21E-35 | *** |
| <b>Cultivar*Treatment</b>      | 4  | 14             | 3.90    | 0.0044   | **  |
| <b>Date</b>                    | 5  | 60             | 13.37   | 1.76E-11 | *** |
| <b>Cultivar*Date</b>           | 20 | 20             | 1.11    | 0.3431   |     |
| <b>Treatment*Date</b>          | 5  | 51             | 11.30   | 8.92E-10 | *** |
| <b>Cultivar*Treatment*Date</b> | 20 | 19             | 1.06    | 0.3893   |     |

**Supplementary Table S4.** Effect test of forced drought (FD) on *OeFT2* relative expression in leaves.

|                           | DF | Sum of Squares | F Ratio | Prob > F |     |
|---------------------------|----|----------------|---------|----------|-----|
| <b>Cultivar</b>           | 4  | 11704          | 40.33   | 2.40E-05 | *** |
| <b>Treatment</b>          | 1  | 170            | 2.35    | 0.164    |     |
| <b>Cultivar*Treatment</b> | 4  | 227            | 0.78    | 0.5668   |     |
| <b>Date</b>               | 2  | 4892           | 33.72   | 0.0001   | *** |
| <b>Cultivar*Date</b>      | 8  | 6309           | 10.87   | 0.0014   | **  |
| <b>Treatment*Date</b>     | 2  | 28             | 0.19    | 0.8269   |     |

**Supplementary Table S5.** Effect test of forced drought (FD) on percent buds forming inflorescences (*i*)

|                           | DF | Sum of Squares | F Ratio | Prob > F |     |
|---------------------------|----|----------------|---------|----------|-----|
| <b>Cultivar</b>           | 4  | 1659           | 6.14    | 0.0006   | *** |
| <b>Treatment</b>          | 1  | 11             | 0.16    | 0.6889   |     |
| <b>Cultivar*Treatment</b> | 4  | 107            | 0.40    | 0.8102   |     |

**Supplementary Table S6.** Flowering data collected after different winters at different locations.

| Year    | Location     | Cultivar |        |          |            |        |
|---------|--------------|----------|--------|----------|------------|--------|
|         |              | Askal    | Barnea | Coratina | Manzanillo | Nabali |
| 2014-15 | Rehovot      | *        |        | *        | *          | *      |
| 2015-16 | Rehovot      |          |        | *        | *          | *      |
| 2016-17 | Rehovot      |          |        |          |            |        |
|         | Gilat        |          |        |          |            |        |
|         | Hanania      |          |        |          |            |        |
| 2017-18 | Rehovot      |          |        |          |            |        |
|         | Rehovot SW** | *        |        | *        | *          | *      |
| 2018-19 | Rehovot      |          |        |          |            |        |
| 2019-20 | Rehovot      |          | *      |          |            |        |
|         | Matityahu    |          |        |          |            |        |
| 2020-21 | Rehovot      |          |        |          |            |        |
|         | Matityahu    |          |        |          |            |        |

\* Data not collected

\*\* Plants moved to a heated glasshouse on December 24<sup>th</sup>, 2017 until the end of winter.

**Supplementary Table S7.** Events of temporary irrigation for specific FD trees

| Plant        | Date of dripper placement | Date of dripper removal   | Early end of drought treatment |
|--------------|---------------------------|---------------------------|--------------------------------|
| Coratina 8   | Dec 2 <sup>nd</sup> 2020  | Dec 14 <sup>th</sup> 2020 | Jan 5 <sup>th</sup> 2021       |
| Coratina 9   | Dec 14 <sup>th</sup> 2020 | Dec 22 <sup>nd</sup> 2020 |                                |
| Barnea 11    | Dec 22 <sup>nd</sup> 2020 | Dec 27 <sup>th</sup> 2020 |                                |
| Barnea 3     |                           |                           |                                |
| Coratina 2   |                           |                           |                                |
| Koroneiki 10 |                           |                           |                                |
| Souri 7      |                           |                           |                                |

**Supplementary Table S8.** Primers for Real-time RTPCR used in this study

| Olea europaea |                         |                  | Arabidopsis Reference Protein (from Tair) |                       |                  | Primers     |                                  |
|---------------|-------------------------|------------------|-------------------------------------------|-----------------------|------------------|-------------|----------------------------------|
| Name          | Accession (transcripts) | Genomic location | Protein Name                              | Arabidopsis accession | E-value (blastp) | Primer Name | Primer sequence                  |
| OeACT7        | OE6A117728T1            | Oe6_s00163       | ACTIN 7 (ACT7)                            | AT5G09810.1           | 5.6E-199         | OeACT7RTfor | 5'-AAGATCAAAGTTGTTGCACCACC-3'    |
|               |                         |                  |                                           |                       |                  | OeACT7RTrev | 5'-CTTAGAAATCCACATCTGCTGGAAT-3'  |
| OeFT2         | OE6A103537T1            | Oe6_s04126       | FLOWERING LOCUS T (FT)                    | AT1G65480.1           | 3.8E-74          | OeFT2RTfor  | 5'-CCTTCGTACTTTTCTACACGCTCATT-3' |
|               |                         |                  |                                           |                       |                  | OeFT2RTrev  | 5'-TCAGTCACCAACCAGTGCAAA-3'      |
| OePIP2.1      | OE6A100469T1            | Oe6_s02336       | PLASMA MEMBRANE INTRINSIC PROTEIN (PIP2)  | AT3G53420.1           | 4.0E-98          | OePIP2RTfor | 5'-TTCGTTGCCACTTTGCTGTT -3'      |
|               |                         |                  |                                           |                       |                  | OePIP2RTrev | 5'-TGCTGGGTTAAATATGTCTCTCCA -3'  |
